1 **Evaluating tank acclimation and trial length for shuttle box**

2 **temperature preference assays**

3

4 Adam Alexander Harman<sup>1</sup> – harmaa1@mcmaster.ca

5 Meghan Fuzzen<sup>1</sup> – fuzzenm@mcmaster.ca

6 Lisa Stoa<sup>1</sup> – lisastoa@mcmaster.ca

7 Douglas Boreham<sup>2</sup> – douglas.boreham@nosm.ca

8 Richard Manzon<sup>3</sup> – richard.manzon@uregina.ca

9 Christopher M. Somers<sup>3</sup> – chris.somers@uregina.ca

10 Joanna Yvonne Wilson<sup>1</sup> – joanna.wilson@mcmaster.ca

11

12

13 <sup>1</sup>Department of Biology, McMaster University, 1280 Main St. West, Hamilton, ON L8S 4K1,

14 Canada

15 <sup>2</sup>Medical Sciences, Northern Ontario School of Medicine, Laurentian University, 935 Ramsey

16 Lake Road, Sudbury, ON P3E 2C6, Canada

17 <sup>3</sup>Department of Biology, University of Regina, 3737 Wascana Parkway, Regina, Saskatchewan

18 S4S 0A2, Canada

19

20

21 **Running Title:** Shuttle box tank acclimation and trial length

22 **Keywords:** Shuttle box, thermal preference, acclimation, behavior, assay, fish

23 **Abstract**

24 Thermal preferenda are largely defined by optimal growth temperature for a species and describe the  
25 range of temperatures an organism will occupy when given a choice. Assays for thermal preferenda  
26 require at least 24 hours, which includes a long acclimation to the tank, limits throughput and thus  
27 impacts replication in the study. Three different behavioral assay experimental designs were tested to  
28 determine the effect of tank acclimation and trial length (12:12, 0:12, 2:2; hours of tank acclimation:  
29 behavioral trial) on the temperature preference of juvenile lake whitefish, using a shuttle box system.  
30 Average temperature preferences for the 12:12, 0:12, and 2:2 experimental designs were  $16.10 \pm 1.07$   
31  $^{\circ}\text{C}$ ,  $16.02 \pm 1.56$   $^{\circ}\text{C}$ ,  $16.12 \pm 1.59$   $^{\circ}\text{C}$  respectively, with no significant differences between the  
32 experimental designs ( $p= 0.9337$ ). Ultimately, length of acclimation time and trial length had no  
33 significant impact, suggesting that all designs were equally useful for studies of temperature preference.

34

35

36

37

38

39

40

41

42

43

44

45

46

47

48

## 49 Introduction

50 Most motile species are thought to exhibit a thermal preferenda or a range of preferred temperatures  
51 that individuals will tend to aggregate at when given the opportunity (Reynolds and Casterlin, 1979).  
52 This temperature should theoretically correlate with the optimum growth temperature, but there are  
53 several other important factors contributing to a thermal preferenda, including photoperiod, salinity,  
54 chemical exposure, age and/or size of fish, bacterial infection, nutritional state/food availability, and  
55 other biotic factors (Reynolds and Casterlin, 1979).

56 The definition of final preferenda assumes a common temperature preference that all members of the  
57 same species will ultimately display (Jobling, 1981). This may be accurate for small warm-water fish, like  
58 goldfish (*Carassius auratus*) and bluegill sunfish (*Lepomis macrochirus*), that were used for much of the  
59 early preferenda work (Reynolds and Casterlin, 1979) because they experience warm, stable  
60 temperatures across their distribution. The same cannot be said for larger temperate species that have  
61 consistently dealt with extreme temperature changes over their evolutionary history. Atlantic cod  
62 (*Gadus morhua*) display significantly different preferenda across their distribution due to a polymorphic  
63 haemoglobin molecule (Petersen and Stefensen, 2002), while juvenile coho salmon (*Oncorhynchus*  
64 *kisutch*) have distinct thermal preferences that align with the thermal profile of home streams (Konecki,  
65 1995). Arctic charr (*Salvelinus alpinus*) that are exposed to repeated freezing and thawing of  
66 lakes/streams, experience seasonal changes in preferenda (Mortensen et al., 2007).

67 Temperature preference ( $T_{pref}$ ) in juvenile lake whitefish (*Coregonus clupeaformis*) is inversely related to  
68 the size and age of the fish (Edsall, 1999), suggesting that conspecifics of different age classes may show  
69 different temperature preferences within the same body of water. Further, the basal metabolic rate of a  
70 fish has been correlated to their aerobic scope and their temperature preference (Killen et al. 2014).  
71 Fish with higher basal metabolic rate have both a lower aerobic scope and temperature preference. To  
72 compensate for increased metabolic demands, fish with higher basal metabolic rate tend to select  
73 colder temperatures when food availability is low (Killen et al., 2014). Therefore, individual life history  
74 traits can account for differences in  $T_{pref}$ .

75 Thermal preferenda assays are conducted in tanks with either a temperature gradient or a choice  
76 between different temperatures. These assays require an initial tank acclimation period where fish  
77 acclimate to the test arena, followed by a behavioral trial. Traditionally, the total assay (acclimation and  
78 trial) have a minimum length of 24 hours (Mortensen et al., 2007; Siikavoupio et al., 2014; Konecki et al.,

79 1995; Petersen and Stefensen, 2002), based on the theory that fish are only displaying their acute  
80 temperature preference, rather than their final preferenda, when <24 hours in a new system (Reynolds  
81 and Casterlin, 1979). Allowing the fish to remain in the new system for at least 24 hours would  
82 theoretically reveal their final preferenda. However, Macnaughton et al. (2018) determined that tank  
83 acclimation time had little effect on the final preferenda of juvenile cutthroat trout (*Oncorhynchus*  
84 *clarkia lewisi*), a cold-adapted fresh-water species. Further, a minimum 24-hour assay length per fish has  
85 significant disadvantages for sample size and throughput in any study. The ability to assess preferenda  
86 would be extremely challenging in experiments that focus on biotic and abiotic influences and fast  
87 growing life stages because of issues (e.g. length of time for experimental treatment, time out of  
88 treatment during the assay, different body sizes) inherent with the total time needed if throughput is  $\leq 1$   
89 fish per day.

90 Fish in the juvenile life-stages, including lake whitefish, are in a period of rapid development and growth  
91 (Rennie, 2009), and Edsall (1999) reported a relationship between size and temperature preference.  
92 Long assay lengths may correspondingly introduce growth as a confounding factor. The influence on  
93 preference from seasons, migration, or physiological transitions with small temporal windows (e.g.  
94 smoltification), are difficult to determine because of limited throughput. Consequently, many studies  
95 (Mortensen, 2007; Barker et al., 2018; Larsson 2005; Petersen and Stefensen, 2002; Siikavuopio, 2014)  
96 use low sample sizes and have low statistical power. Alternatively, some studies test multiple fish at one  
97 time (Edsall, 1999; Sauter et al., 2001) but the social context likely influences results and individual fish  
98 are not truly independent measures. Increasing throughput would have significant advantages for all of  
99 these scenarios.

100 A shuttle box, first described by Neill (1972), is an instrument that determines the temperature  
101 preference of aquatic animals by allowing them to choose between two tanks held at different  
102 temperatures. Once acclimated to the system, fish will 'shuttle' between the two compartments to  
103 regulate body temperature, allowing analysis of preferred temperature and avoidance temperatures.  
104 This study examined the effect of tank acclimation and trial length on the quality and quantity of data  
105 produced to determine thermal preference ( $T_{pref}$ ) during behavioral assays. We used three distinct  
106 experimental designs, starting with a 24-hour total assay length (12 hours tank acclimation:12 hours trial  
107 length) as a baseline. It was hypothesized that experimental designs of different lengths (24 hours, 12  
108 hours, 4 hours) would have a limited effect on the determined thermal preference of lake whitefish  
109 (*Coregonus clupeaformis*) and that shorter assay designs could increase throughput.

## 110 **Methods**

111 Fertilized lake whitefish (LWF) embryos were acquired from Sharbot Lake White Fish Culture Station  
112 (Sharbot Lake, ON) on November 30<sup>th</sup>, 2017. Embryos were incubated under simulated seasonal  
113 temperatures until hatch. Embryos were initially held at 8°C and cooled (1°C/week) to 2°C. After 100  
114 days of incubation, embryos were warmed (1°C/week) until hatching. Median hatch occurred at 158  
115 days post fertilization. Hatchlings were placed in petri dishes at 8°C until successful exogenous feeding.  
116 Larvae were transferred to tanks and warmed (1°C/week) to 15°C, where they remained until testing (5-  
117 6 months). LWF were initially fed *Artemia* nauplii and slowly transitioned to pellet feed (Otohime B1  
118 (200-360 µm) – C2 (920-1,410 µm) larval feed).

119 The shuttle box system (Loligo<sup>®</sup>) consists of two cylindrical tanks connected by a small rectangular  
120 ‘shuttle’ to allow movement of animals between the tanks. Each tank is assigned as the increasing  
121 (INCR) or decreasing (DECR) side, indicating the direction of temperature change when fish occupy that  
122 tank. To accurately regulate temperature, system water was pumped through heat-exchange coils in hot  
123 (28°C) and cold (4°C) water baths (60L aquaria) with mixing in separate buffer tanks for each side. A  
124 Recirculator 1/4 HP Chiller, Magnetic Drive Centrifugal Pump (300W/600W/950W @ 0°C/10°C/20°C;  
125 VWR) and a 400W aquarium heater were used to maintain the temperatures in the cold and warm bath,  
126 respectively. Ice was added to the cold bath every 2 hours during shuttle box operation to increase  
127 cooling capacity. Polystyrene insulation (1/2"), foam insulation tape (1/4"), and loose fiberglass  
128 insulation were used to maintain stable temperatures in the cold-water bath. System water flows (240  
129 mL/min) via gravity through temperature probes and into the shuttle box where counter-directional  
130 currents minimize mixing between the two sides. A USB 2.0 uEye Camera tracked larval fish under  
131 infrared light (Loligo<sup>®</sup> Infrared Light Tray), and the Shuttlesoft<sup>®</sup> software determined the ‘live’ location  
132 of the tracked object. Shuttlesoft<sup>®</sup> uses contrast to identify and track objects and required even,  
133 symmetrical overhead lighting; black opaque plastic was used to dim fluorescent lights directly overhead  
134 and prevent glare.

135 In our experiments, we defined distinct static or dynamic modes for the shuttle box; the total assay  
136 length was the sum of time for each mode. Static mode (tank acclimation) was used to acclimate the fish  
137 to the shuttle box system but was not used to determine temperature preference. In this mode, the  
138 shuttle box maintained stable temperatures of 14°C and 16°C with a hysteresis of 0.25°C. Dynamic mode  
139 (behavioral trial) was used to determine temperature preference; fish were actively tracked and the  
140 entire system would warm or cool (hysteresis = 0.1°C) at a rate of 4°C/hour, depending on whether the

141 fish was in the INCR or DECR tank. In both static and dynamic modes, the difference in temperature  
142 across the tanks was  $\Delta 2^{\circ}\text{C}$ . Hysteresis values were determined experimentally for each operating mode  
143 independently to achieve the most stable water temperatures over time. A maximum temperature of  
144  $23^{\circ}\text{C}$  and a minimum temperature of  $7^{\circ}\text{C}$  prevented exposure to extreme temperatures, which could  
145 cause stress or mortality (Edsall and Rottiers, 1976).

146 The orientation of the INCR and DECR tanks and the side to which the fish would be introduced were  
147 randomized for each individual, using an online tool (random.org), to limit any potential bias introduced  
148 by visual cues or side preference. LWF were randomly selected from their home tank ( $15^{\circ}\text{C}$ ) and  
149 transported to the shuttle box system in 1L glass beakers. LWF were introduced to one side of the  
150 shuttle box, with a plastic divider separating the two halves. The assay started immediately after the  
151 barrier was removed, initiating acclimation, and continued until the end of the behavioral trial. While  
152 data were collected throughout, only data collected during the behavioral trial (dynamic mode) were  
153 used for temperature preference analysis. Shuttlesoft<sup>®</sup> calculates temperature preference ( $T_{\text{pref}}$ ) over  
154 time as the median occupied temperature; velocity (cm/s), distance (cm), time spent in INCR/DECR,  
155 number of passages and avoidance temperatures were collected in 1 second intervals. The fish  
156 remained in the shuttle box throughout the entire assay, without interference or handling. After  
157 completion of the assay, fish were removed and measured for total length ( $\pm 1$  mm) and mass ( $\pm 0.01$  g)  
158 before returning fish to a separate home tank ( $15^{\circ}\text{C}$ ).

159 Three experiments were conducted to test the effect of tank acclimation and trial length on the quality  
160 of data, namely 12:12, 0:12, or 2:2 designs representing the number of hours in static mode (tank  
161 acclimation) and dynamic mode (behavioral trial), respectively (Figure 1a). Summary statistics were  
162 generated for each experimental design to compare the effect of the design on data accuracy and  
163 variability. Mean  $T_{\text{pref}}$  + standard deviation was used to compare the variation between fish, which is the  
164 major limit of statistical power. An experimental design was considered equally useful if it produced  $T_{\text{pref}}$   
165 data that were not statistically different. Power analyses were completed for each experimental design  
166 to compare optimal sample sizes at the lowest acceptable power ( $1-\beta = 0.60$ ).

167

## 168 **Results and Discussion**

169 In the first experimental design (12:12), juvenile LWF ( $n=10$ ) had 12 hours of over-night tank acclimation  
170 (9 pm – 9 am) in static mode, followed by 12 hours of behavioral trials (9 am – 9 pm) in dynamic mode.

171 The maximum throughput was 1 fish per day (Figure 2e). This design included the longest tank  
172 acclimation period, the lowest throughput and was predicted to decrease between-fish variability. The  
173 average  $T_{pref}$  was  $16.10 \pm 1.07$  °C (Figure 1a), which was the lowest standard deviation in average  $T_{pref}$   
174 across the experimental designs, as expected.

175 Available literature suggests that a long tank acclimation period prior to the behavioral trial is required  
176 to observe the true temperature preference of a species (Reynolds and Casterlin, 1979). The second  
177 design (0:12) explicitly tested the effect of tank acclimation by completely removing it; juvenile LWF  
178 ( $n=9$ ) had a 12-hour behavioral trial (9 am – 9 pm) under dynamic mode with no prior acclimation. One  
179 fish was excluded because the system shut down prematurely. Removal of the static period was  
180 predicted to increase the variation in  $T_{pref}$  between individuals. As predicted, the standard deviation of  
181  $T_{pref}$  increased, but not drastically (Figure 1a). Throughput (1 fish/day) remained the same because only  
182 the overnight tank acclimation was removed; while 2 fish/day were possible if we ran assays in both day  
183 and night, results were more comparable with dynamic mode in the same part of the diurnal cycle (day  
184 light). The average  $T_{pref}$  was  $16.03 \pm 1.56$  °C (Figure 1a), which was not statistically different ( $p=0.912$ )  
185 from the outcome using the baseline design. The data from this experiment were analyzed in 2-hour  
186 sub-sets (i.e. 2 hours, 4 hours, 6 hours) to simulate shorter behavioral trial durations (Figure 1b).  
187 Average  $T_{pref}$  was not statistically different ( $p=0.1923$ ) between a 12-hour and a 2-hour behavioral trial  
188 length (Figure 1b), suggesting that not only was long tank acclimation not required but shorter trials  
189 were possible. The advantage of no or limited tank acclimation coupled with a shorter behavioral trial  
190 was that throughput could be increased to multiple fish per day, offering the opportunity to increase  
191 total sample size or decrease the time needed to assess  $T_{pref}$  in different treatment groups.

192 A third experimental design (2:2) was implemented with 2 hours of tank acclimation and 2 hours of  
193 behavioral trial, to increase throughput. Three time periods were used (11 am – 1 pm, 3 pm – 5 pm, 7  
194 pm – 9 pm) instead of one (9 am – 9 pm), which would triple throughput; there was no effect of time of  
195 day. This design has not been reported in the literature and this is the first attempt to calculate  $T_{pref}$   
196 from such a short assay, to our knowledge. The average  $T_{pref}$  was  $16.12 \pm 1.59$  °C (Figure 1a) and was not  
197 significantly different from either alternative experimental design ( $p=0.9337$ ). Further, the standard  
198 deviation did not drastically increase (Figure 1a), although it was the largest of the tested designs.

199 Shuttlesoft® automatically calculates the cumulative median of  $T_{pref}$  every second, and that data can be  
200 compared between individuals and groups. Figure 3 compares individual  $T_{pref}$  data to the average,  
201 showing the spread of the data as well as the stability over time. A unique aspect of the shuttle box

202 behavioral assay is that a fish must be shuttling between the two sides to maintain a constant  
203 temperature within the system; switching sides is an active behavioral choice. Traditional methods  
204 require the fish to remain stationary to select a temperature in a gradient. All experimental designs  
205 followed a similar pattern of an initial period of high variability, followed by a prolonged period of  
206 relative stability (Figure 3), suggesting an active choice was made. Therefore, the different designs  
207 appear largely equivalent, suggesting that long tank acclimation and long behavioral trials are not  
208 necessary to determine  $T_{pref}$ , at least for juvenile LWF. This offers the opportunity to increase the  
209 throughput on a temperature preference study where confounding variables (e.g. rapid body growth,  
210 exposure to abiotic or biotic factors) could significantly impact the data if the traditional design (>24  
211 hours per fish) was used.

212 Tank acclimation and behavioral trial intervals were chosen based on both scientific evidence and  
213 logistics. In all cases, we note the throughput (i.e. how many fish can be tested per week) to highlight  
214 the relevant trade off that would impact experimental design choice. While previous literature  
215 (Mortensen et al., 2007; Siikavoupio et al., 2014; Konecki et al., 1995; Petersen and Stefensen, 2002)  
216 would suggest acclimating fish to the tank for a period of >24 hours, we used a total assay length of 24  
217 hours (12-hour static tank acclimation, 12-hour dynamic behavioral trial) as the baseline. This was  
218 chosen because a total assay length of >24 hours would lead to a throughput of only 3 fish/week, which  
219 would not have been feasible for a large-scale experiment, particularly with fast growing juvenile fish.  
220 Considering the juvenile fish used here (5 months of age), it would be important to account for changes  
221 in individual growth during temperature preference studies. A negative correlation between growth and  
222 temperature preference has been observed in lake whitefish (Edsall, 1999), which suggests study length  
223 could be an influential factor in experiments with fast growing life stages. Increasing throughput could  
224 allow testing a wider range of individuals (Figure 2e) and may better capture a population's natural  
225 variability.

226 Using the 2:2 design would yield an experiment that is 34 days in length to provide the minimum sample  
227 size needed for three treatment groups (Figure 2e). Even within 34 days, individual juvenile LWF tested  
228 near the beginning of the study would be ~20% younger and 11% smaller (LWF are 9.11 g ( $\pm$  2.8) versus  
229 10.23 g ( $\pm$  2.0) at 5 and 6 months, respectively; unpublished data). It would be important to minimize  
230 length of time to collect temperature preference data and consider the trade-offs between variance and  
231 sample size on the statistical power to assess differences across treatment groups. The same can be said  
232 when determining  $T_{pref}$  within small temporal windows (e.g. smoltification, seasonality, developmental



233 windows) where small sample sizes would limit statistical power. The functional trade-offs between  
234 statistical power ( $1-\beta$ ), variance ( $\delta^2$ ), sample size ( $n$ ), and throughput were investigated using power  
235 analysis (Figure 2) for the various experimental designs. While experimental design 3 (2:2) led to  
236 increased variation in mean  $T_{pref}$ , the increased throughput allowed for an increased sample size while  
237 still minimizing the total time needed for the experiment. If the number of fish were limited or growth  
238 and developmental concerns were not as relevant (e.g. adult fish), then minimizing variation may be  
239 more important.

240 This study used a maximum rate of change of 4 °C/hour, similar to what has been previously reported  
241 (Macnaughton et al., 2018; Konecki, 1995; Petersen and Stefensen, 2002). This could have limited the  
242 range of temperatures experienced by the juvenile LWF. If a fish occupied the INCR zone for the entire  
243 duration of the behavioral trial, the system would have cooled by 8°C, only just hitting the upper  
244 temperature limit of the shuttle box. Thus, to reach extreme temperature preferences a fish must  
245 exhibit low (<10) passage numbers, a problem when preference is determined by active swimming. This  
246 problem could potentially be avoided by increasing the rate of temperature change (Barker et al., 2018),  
247 at the expense of possible physical stress. For our experiments, data were excluded only when fish made  
248 no passages in the dynamic mode. In all cases, fish made regular passages in at least one mode,  
249 indicating they were active and able to explore the entire arena. Hyperactive fish would likewise pose a  
250 problem for the system; there was no animal that exhibited so many crosses that the system could not  
251 respond and change temperature.

252 Thermal preference can be an important behavioral endpoint but traditionally require long periods of  
253 time (>24 hours) to determine. The results of this study show that decreasing the total assay length (24  
254 hours to 4 hours) did not significantly affect the  $T_{pref}$  of juvenile lake whitefish. The shuttle box is a  
255 powerful behavioral tool and a less restrictive definition of  $T_{pref}$  and more flexibility in the assay design  
256 would allow  $T_{pref}$  as a viable behavioral endpoint for a variety of species and life stages with more  
257 experimental power.

258 (a)

| Experimental Design | Sample Size (n) | Average $T_{pref}$ ( $^{\circ}\text{C}$ ) | Standard Deviation | P-Value |
|---------------------|-----------------|-------------------------------------------|--------------------|---------|
| 12:12               | 10              | 16.10                                     | 1.07               | -       |
| 0:12                | 9               | 16.03                                     | 1.56               | 0.912   |
| 2:2                 | 9               | 16.12                                     | 1.59               | 0.971   |

259

260 (b)

| Data Sub-set | Average $T_{pref}$ ( $^{\circ}\text{C}$ ) | Standard Deviation | P-Value |
|--------------|-------------------------------------------|--------------------|---------|
| 12 hours     | 16.03                                     | 1.56               | -       |
| 6 hours      | 16.36                                     | 1.14               | 0.513   |
| 4 hours      | 16.92                                     | 1.37               | 0.241   |
| 2 hours      | 17.06                                     | 1.66               | 0.1923  |

261

262 (c)

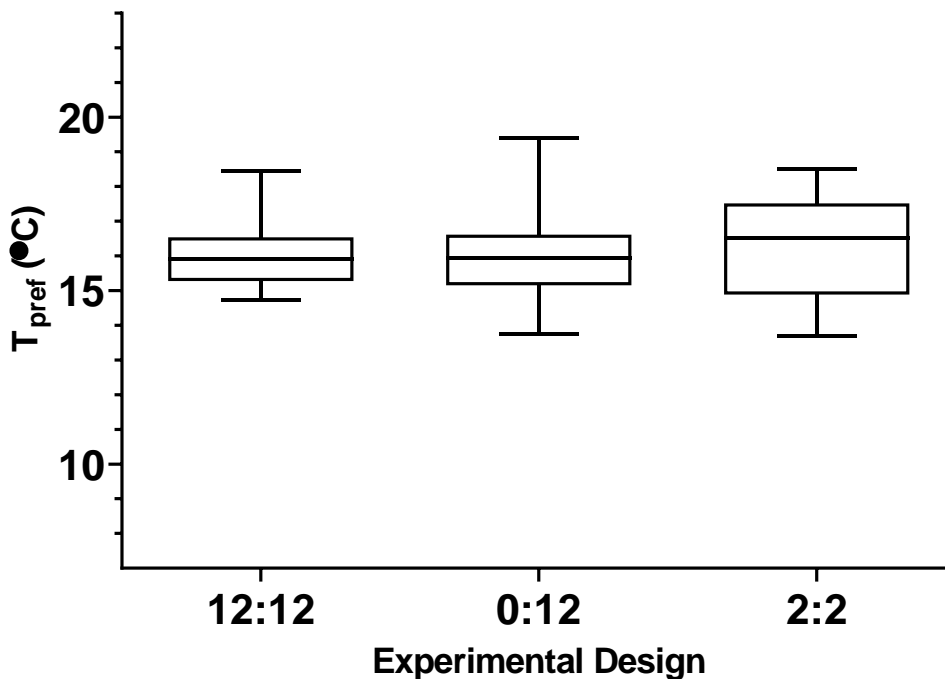

263

264 Figure 1: (a) Summary of average temperature preference ( $T_{pref}$ ) data from three different experimental designs.  $T_{pref}$  is  
265 calculated as the cumulative median of occupied temperature. 12:12, 0:12, or 2:2 designs representing the number of hours in  
266 static mode (tank acclimation) and dynamic mode (behavioral trial), respectively. P-values were determined using one way  
267 ANOVA with post-hoc comparisons. (b) Sub-set analysis conducted using the 0:12 experimental design, behavioral trials were  
268 sub-set into 2, 4, and 6-hour windows. P-values were determined using ANOVA. (c) Box plot comparing  $T_{pref}$  between 12:12,  
269 0:12 and 2:2 experimental designs. The height of the box corresponds to Q1 – Q3, and the bars correspond to the minimum and  
270 maximum values. Y-axis represents the thermal range of the shuttle box system.

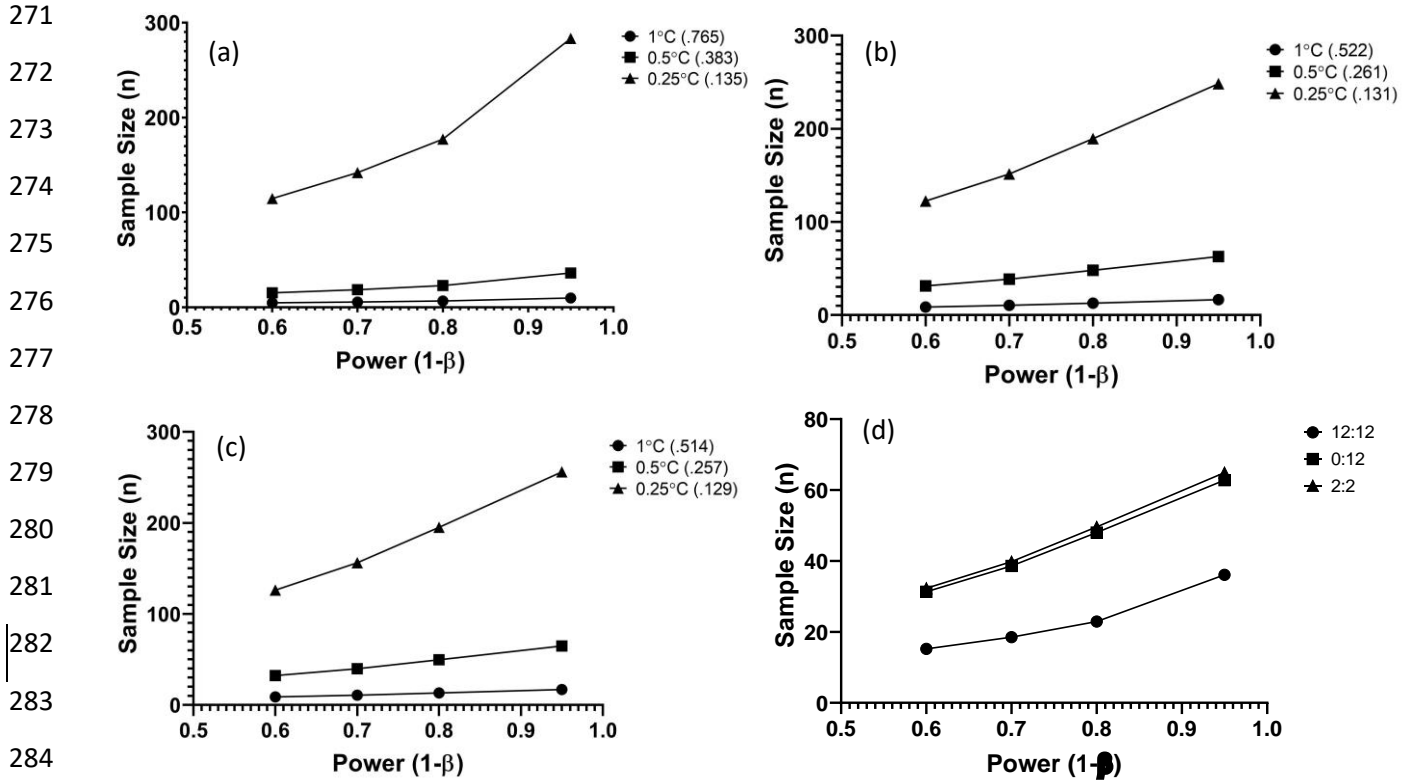

285 (e)

| Experiment Design | Minimum Sample Size | # of Treatments | Total # of Fish | Throughput (Fish/Day) | Study Length |
|-------------------|---------------------|-----------------|-----------------|-----------------------|--------------|
| 12:12             | 15                  | 3               | 45              | 1                     | 45 days      |
| 0:12              | 31                  | 3               | 93              | 1                     | 93 days      |
| 2:2               | 32                  | 3               | 96              | 3                     | 32 days      |

286

287 (f)

$$f = \sqrt{\frac{\sum_{i=1}^k p_i * (\mu_i - \mu)^2}{\sigma^2}}$$

where  $p_i = n_i / N$ ,  
 $n_i$  = number of observations in group  $i$   
 $N$  = total number of observations  
 $\mu_i$  = mean of group  $i$   
 $\mu$  = grand mean  
 $\sigma^2$  = error variance within groups

288

289

290 Figure 2: (a, b, c) Relationship between sample size (n) and power (1-β) for experimental (Expt) designs 12:12 (a), 0:12 (b), and  
 291 2:2 (c), representing the number of hours in static mode (tank acclimation) and dynamic mode (behavioral trial), respectively.  
 292 Curves were generated using iterative power analysis (pwr package – R). Effect sizes were calculated using panel (f) by  
 293 predicting expected differences between means. (d) Power analysis using 0.5°C effect sizes, each data series corresponds to an  
 294 experimental design. (e) Summary of power analysis results. Minimum sample size corresponds to n calculated with 0.5°C effect  
 295 size and 1-β = 0.6. # of treatments can vary with experimental design, three was chosen as a reasonable example. Total number  
 296 of fish is minimum sample size times the number of treatments. Study length was calculated by dividing the total number of fish  
 297 by the throughput of the experimental design, 12:12 = 1/day, 0:12 = 1/day, 2:2 = 3/day. (f) Equation used to calculate effect size  
 298 (f) for ANOVA.

299  
300  
301  
302  
303  
304  
305  
306  
307  
308  
309  
310  
311  
312  
313  
314  
315  
316  
317  
318  
319  
320  
321  
322  
323  
324  
325  
326

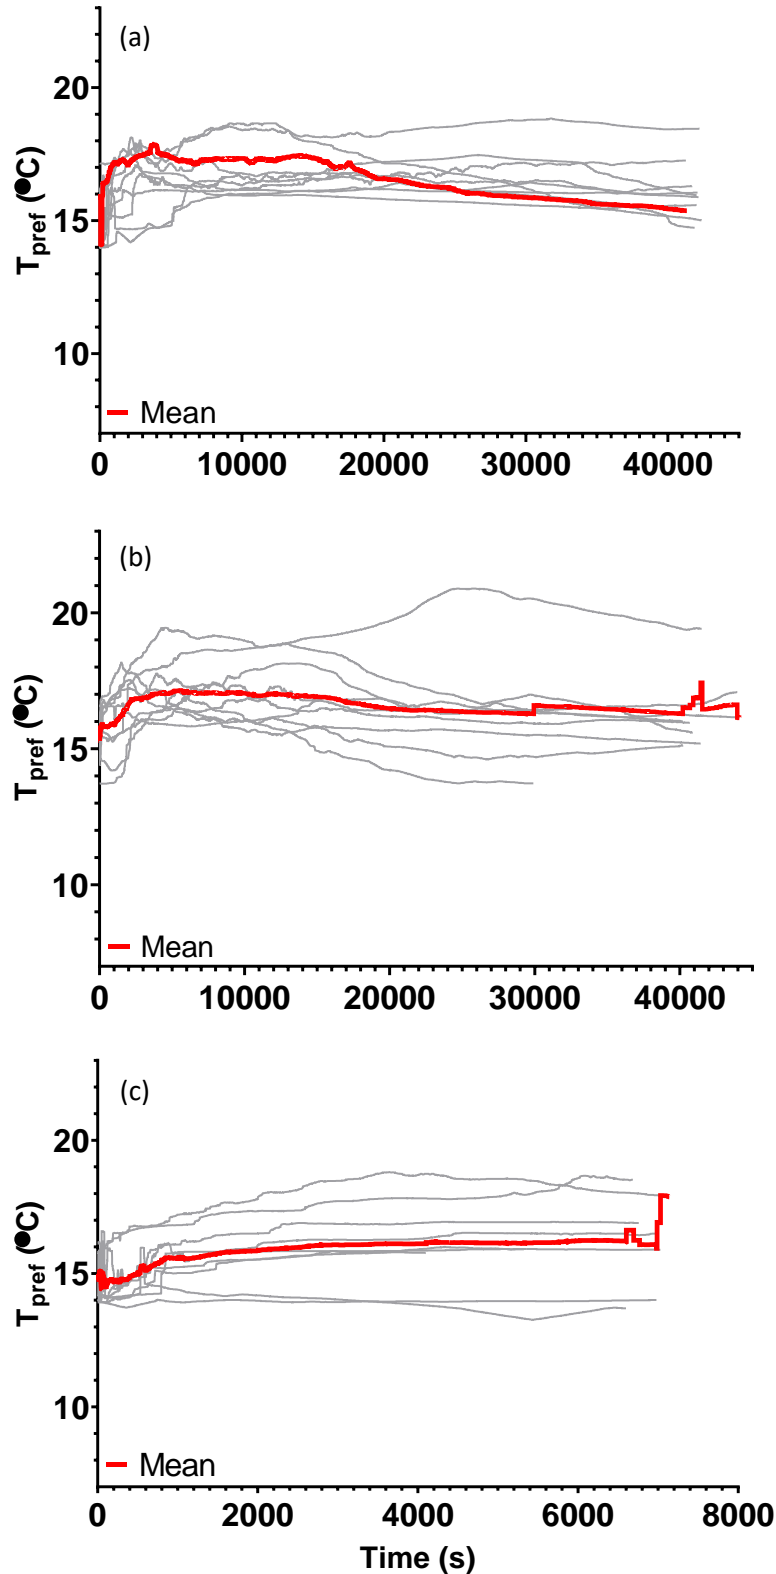

327 Figure 3: Cumulative median temperature preference ( $T_{pref}$ ) calculated every 1 second for experimental designs 12:12 (a), 0:12  
328 (b) and 2:2 (c), representing the number of hours in static mode (tank acclimation) and dynamic mode (behavioral trial),  
329 respectively. Grey lines represent the  $T_{pref}$  of individual fish over time. Red line represents the mean  $T_{pref}$  for all fish. Y-axis  
330 represents the thermal range of the shuttle box system.

331 **References**

- 332 Barker, B. D., et al. (2018). "Hot or not? Comparative behavioral thermoregulation, critical temperature  
333 regimes, and thermal tolerances of the invasive lionfish *Pterois* sp versus native western North Atlantic  
334 reef fishes." Biological Invasions **20**(1): 45-58.
- 335 Ebener, M.P., Kinnunen, R.E., Schneeberger, P.J., Mohr, L.C., Hoyle, J.A., Peeters, P. (2008).  
336 "Management of commercial fisheries for lake whitefish in the Laurentian Great Lakes of North America."  
337 International Governance of Fisheries Ecosystems, 99-143.
- 338 Edsall, T. A. (1999). "Preferred Temperatures of Juvenile Lake Whitefish." Journal of Great Lakes  
339 Research **25**(3): 583-588.
- 340 Edsall, T. A. and D. V. Rottiers (1976). "Temperature Tolerance of Young-of-the-Year Lake Whitefish,  
341 *Coregonus clupeaformis*." Journal of the Fisheries Research Board of Canada **33**(1): 177-180.
- 342 Eliason, E.J., Clark, T.D., Hague, M.J. et al. (2011). "Differences in Thermal Tolerance Among Sockeye  
343 Salmon Populations". Science **332**(6025):109-112.
- 344 Larsson, S. (2005). "Thermal preference of Arctic charr, *Salvelinus alpinus*, and brown trout, *Salmo trutta*  
345 - Implications for their niche segregation". Environmental Biology of Fishes (2005) **73**: 89–96.
- 346 Jobling, M. (1981). "Temperature Tolerance and Final Preferendum - Rapid Methods for the Assessment  
347 of Optimum Growth Temperatures." Journal of Fisheries Biology, **19**: 439-455.
- 348 Killen, S. S. (2014). "Growth trajectory influences temperature preference in fish through an effect on  
349 metabolic rate." Journal of Animal Ecology **83**(6): 1513-1522.
- 350 Konecki, J. T., et al. (1995). "Temperature preference in two populations of juvenile coho salmon,  
351 *Oncorhynchus kisutch*." Environmental Biology of Fishes **44**(4): 417-421.
- 352 Macnaughton, C. J., et al. (2018). "Using the shuttlebox experimental design to determine temperature  
353 preference for juvenile Westslope Cutthroat Trout (*Oncorhynchus clarkii lewisi*)." Conservation  
354 Physiology **6**: 10.
- 355 Mortensen, A., et al. (2007). "Seasonal variation in the temperature preference of Arctic charr  
356 (*Salvelinus alpinus*)." Journal of Thermal Biology **32**(6): 314-320.
- 357 Neill, W. H., et al. (1972). "Behavioral Thermoregulation by Fishes: A New Experimental Approach."  
358 Science **176**(4042): 1443-1445.
- 359 Petersen, M. F. (2003). "Preferred temperature of juvenile Atlantic cod *Gadus morhua* with different  
360 haemoglobin genotypes at normoxia and moderate hypoxia." Journal of Experimental Biology **206**(2):  
361 359-364.
- 362 Rennie, M. D., et al. (2009). "Factors affecting the growth and condition of lake whitefish (*Coregonus*  
363 *clupeaformis*)." Canadian Journal of Fisheries and Aquatic Sciences **66**(12): 2096-2108.
- 364 Reynolds, W. W. and M. E. Casterlin (1979). "Behavioral Thermoregulation and the "Final Preferendum"  
365 Paradigm." American Zoologist **19**(1): 211-224.
- 366 Siikavuopio, S. I., et al. (2014). "Temperature preference of juvenile Arctic charr originating from  
367 different thermal environments." Aquatic Ecology **48**(3): 313-320.

368
